- Oxygen-ICU randomized clinical trial. JAMA 2016; 316:1583–9
29. Helmerhorst HJ, Arts DL, Schultz MJ, van der Voort PH, Abu-Hanna A, de Jonge E, van Westerloo DJ: Metrics of arterial hyperoxia and associated outcomes in critical care. Crit Care Med 2017; 45:187–95
  30. Ni YN, Wang YM, Liang BM, Liang ZA: The effect of hyperoxia on mortality in critically ill patients: A systematic review and meta analysis. BMC Pulm Med 2019; 19:53
  31. Chu DK, Kim LH, Young PJ, Zamiri N, Almenawer SA, Jaeschke R, Szczeklik W, Schünemann HJ, Neary JD, Alhazzani W: Mortality and morbidity in acutely ill adults treated with liberal *versus* conservative oxygen therapy (IOTA): A systematic review and meta-analysis. Lancet 2018; 391:1693–705
  32. Siemieniuk RAC, Chu DK, Kim LH, Güell-Rous MR, Alhazzani W, Soccia PM, Karanicolas PJ, Farhoumand PD, Siemieniuk JLK, Satia I, Irusen EM, Refaat MM, Mikita JS, Smith M, Cohen DN, Vandvik PO, Agoritsas T, Lytvyn L, Guyatt GH: Oxygen therapy for acutely ill medical patients: A clinical practice guideline. BMJ 2018; 363:k4169

## ANESTHESIOLOGY REFLECTIONS FROM THE WOOD LIBRARY-MUSEUM

### May Day of 1961 and Self-appendectomy with Novocaine in Antarctica: Leonid Rogozov's 0.5% Solution?

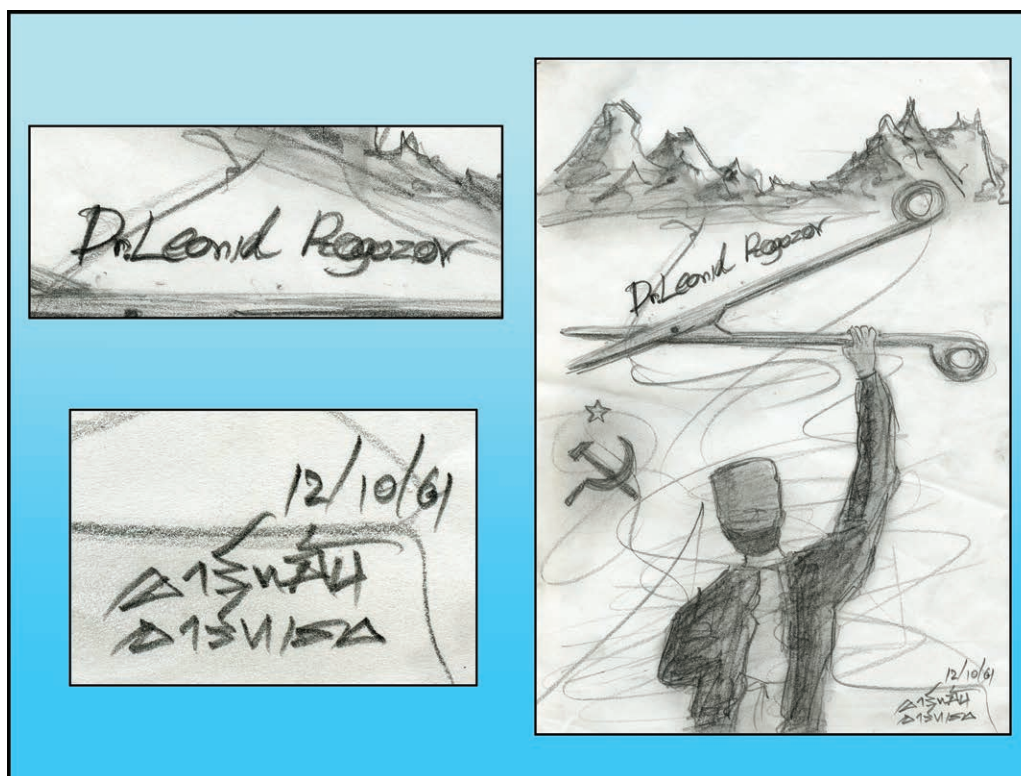

The sole physician to a 13-man Soviet team of researchers at isolated Novolazarevskaya Station in Antarctica, Dr. Leonid Ivanovich Rogozov (1934 to 2000) diagnosed his own appendicitis in late April of 1961. Using a mirror and syringe of 0.5% Novocaine (procaine), Rogozov performed self-surgery under a supplemented field block on May Day, successfully removing his appendix. His surgical feat made headlines worldwide and was even memorialized “12/10/61” by Thai artist Artchan Artthex (*lower left*). Titled “Dr. Leonid Rogozov” (*upper left*), this graphite-on-paper features a rear view of the surgically gowned Rogozov with the peaks of Antarctica in the background (*right*). (Copyright © the American Society of Anesthesiologists’ Wood Library-Museum of Anesthesiology.)

George S. Bause, M.D., M.P.H., Honorary Curator and Laureate of the History of Anesthesia, Wood Library-Museum of Anesthesiology, Schaumburg, Illinois, and Clinical Associate Professor, Case Western Reserve University, Cleveland, Ohio. UJYC@aol.com.
